# Supplementary material for: Two-dimensional FeCo2O4 nanosheets with oxygen vacancies enable boosted oxygen evolution
Source: Royal Society of Chemistry journal article supplement (doi:10.1039/d2nj03341k), 2022-01-01
Supplement: d2nj03341k1.pdf [file d2nj03341k1.pdf]

## **Two-dimensional FeCo<sub>2</sub>O<sub>4</sub> nanosheets with oxygen vacancy enable boosted oxygen evolution**

Kun Xiang<sup>a,b\*</sup>, Li Meng<sup>c,d</sup>, Yan Zhang<sup>e</sup>

<sup>a</sup> School of Chemistry and Environmental Engineering, Wuhan Institute of Technology,  
Wuhan 430205, China

<sup>b</sup> Key Laboratory of Optoelectronic Chemical Materials and Devices of Ministry of  
Education, Jiangnan University, Wuhan 430205, China

<sup>c</sup> School of Arts, Ankang University, Ankang 725000, China

<sup>d</sup> College of Chemistry, Zhengzhou University, Zhengzhou 450001, China

<sup>e</sup> Pingshan Translational Medicine Center, Shenzhen Bay Laboratory, Shenzhen,  
518055, China.

Corresponding author:

E-mail addresses: [xiangkun@wit.edu.cn](mailto:xiangkun@wit.edu.cn); [kunx2011@163.com](mailto:kunx2011@163.com) (K. Xiang).

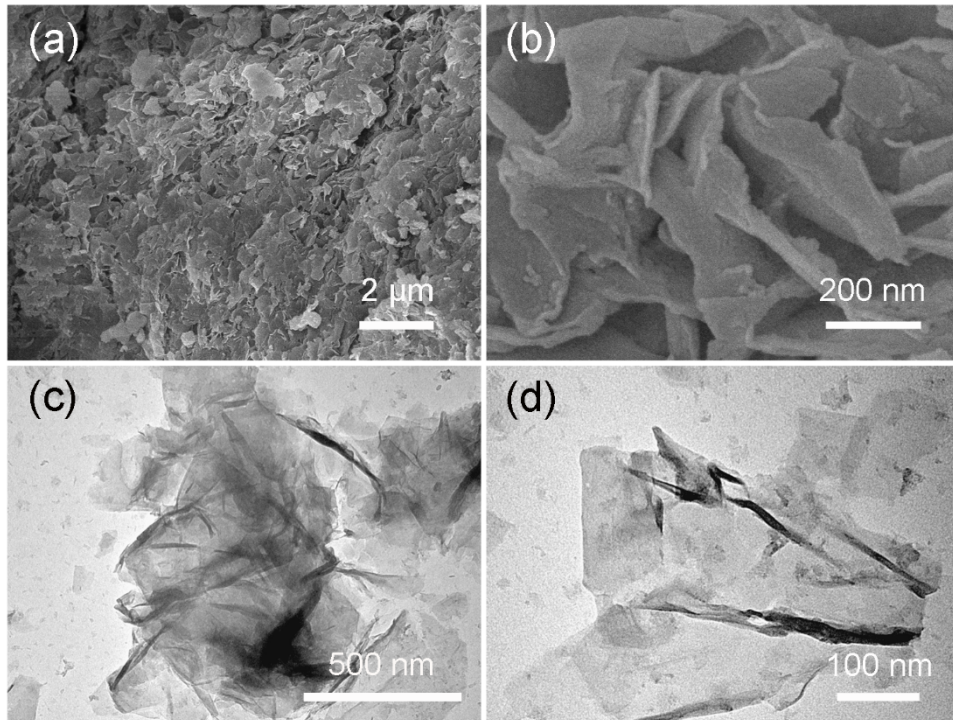

Fig. S1. SEM and TEM with different magnification of FeCo-LDH precursor.

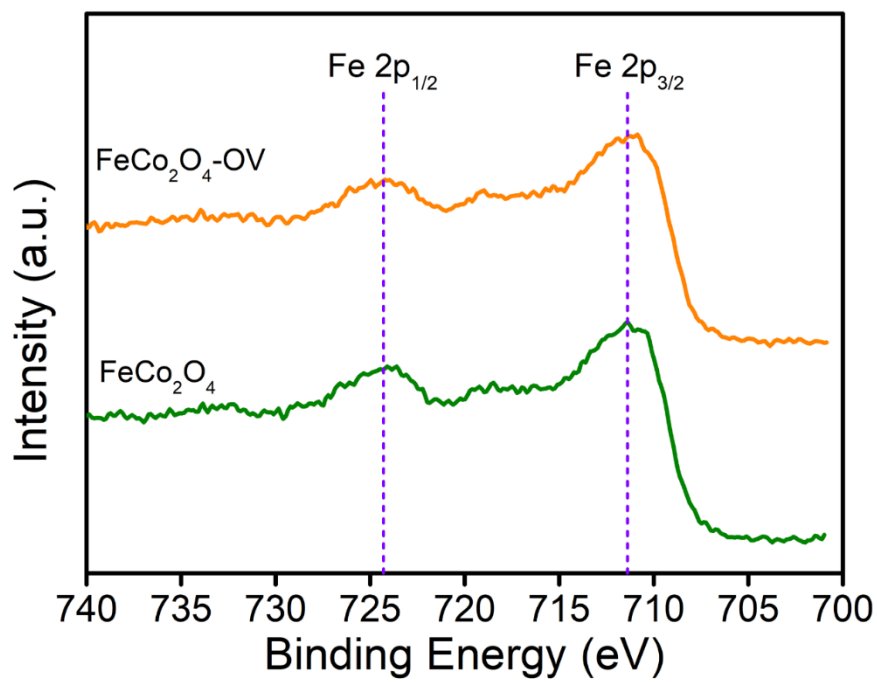

Fig. S2. High resolution XPS spectra of Fe in FeCo<sub>2</sub>O<sub>4</sub> NSs and FeCo<sub>2</sub>O<sub>4</sub>-OV NSs.

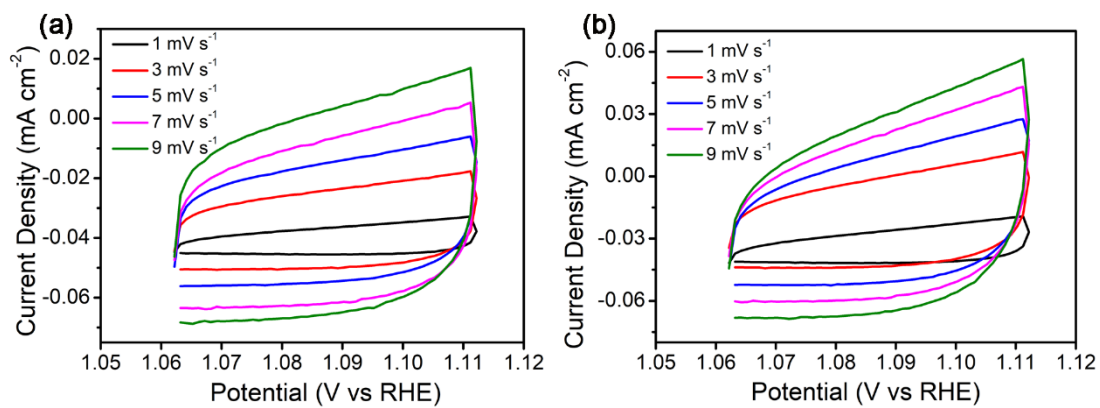

Fig. S3. The CV curves of FeCo<sub>2</sub>O<sub>4</sub> NSs and FeCo<sub>2</sub>O<sub>4</sub>-OV NSs at different scan rates.
